# Supplementary material for: A 3D MOF constructed from dysprosium(iii) oxalate and capping ligands: ferromagnetic coupling and field-induced two-step magnetic relaxation
Source: Royal Society of Chemistry journal article supplement (doi:10.1039/c6cc00498a), 2016-01-01
Supplement: c6cc00498a1.pdf [file c6cc00498a1.pdf]

## Supporting Information for

# **A 3D MOF constructed from dysprosium(III) oxalate and capping ligand: ferromagnetic coupling and field-induced two-step magnetic relaxation**

Cai-Ming Liu,\* De-Qing Zhang and Dao-Ben Zhu

*Beijing National Laboratory for Molecular Sciences, Center for Molecular Science, Key Laboratory of Organic Solids, Institute of Chemistry, Chinese Academy of Sciences, Beijing 100190, P.R. China*

## **1. Experimental**

### ***Materials and instrumentation***

All chemicals are reagent grade and commercial available. The elemental analyses were determined on a Varlo ELIII elemental analyser. The infrared spectra were performed on a Bruker/Tensor-27 spectrophotometer with pressed KBr pellets in the range 4000–400  $\text{cm}^{-1}$ . The X-ray powder diffraction (XRD) spectra were recorded on a PANalytical /Empyrean-1 diffractometer with Cu-K $\alpha$  ( $\lambda = 1.5418 \text{ \AA}$ ) radiation. The magnetic susceptibility measurements were carried out on a Quantum Design MPMS-XL5 SQUID magnetometer. Diamagnetic corrections were estimated from Pascal's constants of all components.

### ***Synthesis of 1***

A mixture of  $\text{Dy}(\text{NO}_3)_3 \cdot 5\text{H}_2\text{O}$  (1.0 mmol), oxalic acid(2.0 mmol), 1,10-phenanthroline(1.0 mmol) and  $\text{H}_2\text{O}$ (15 mL) in a Teflon-lined stainless steel autoclave (25 mL) was kept at 170 °C for seven days. Light yellow rod crystals of **1** were harvested after the autoclave had cooled to room temperature overnight, these crystals were washed with water and dried at ambient temperature. 80% yield based on Dy. Elemental analysis (%): calc. for  $\text{C}_{15}\text{H}_9\text{DyN}_2\text{O}_{6.50}$  (**1**): C, 37.24; H, 1.88; N, 5.79. Found: C, 37.29; H, 1.91; N 5.73. IR (KBr pellet,  $\text{cm}^{-1}$ ): 3683(w), 3441(b, s), 3091(w), 3068(w), 2927(w), 1685(m), 1631(s), 1615(s), 1521(w), 1426(w), 1364(w), 1347(w), 1316(m), 1226(w),

1212(w), 1147(w), 1106(w), 1089(w), 1052(w), 1038(w), 1005(w), 854(w), 797(m), 728(m), 640(w).

### Crystallography

A single crystal with dimensions  $0.21 \times 0.06 \times 0.05$  mm<sup>3</sup> of **1** was selected to collect data on a Rigaku MM007HF Saturn724+ diffractometer with *Mo-K $\alpha$*  radiation ( $\lambda = 0.71073$  Å) in the  $\varphi$ -scan mode. Cell parameters were obtained by the global refinement of the positions of all collected reflections. The structure was solved by direct methods and refined with the ShelXL refinement package using least squares minimisation. All non-hydrogen atoms were refined anisotropically, and all hydrogen atoms but those in the solvent hydrate molecule were set in calculated positions and refined as riding atoms.

Table S1. Continuous Shape Measures calculation for the Dy(III) ion in **1**.

---

S H A P E v2.1                      Continuous Shape Measures calculation  
(c) 2013 Electronic Structure Group, Universitat de Barcelona  
Contact: llunell@ub.edu

---

#### Dy structures

|          |    |     |                                            |
|----------|----|-----|--------------------------------------------|
| OP-8     | 1  | D8h | Octagon                                    |
| HPY-8    | 2  | C7v | Heptagonal pyramid                         |
| HBPY-8   | 3  | D6h | Hexagonal bipyramid                        |
| CU-8     | 4  | Oh  | Cube                                       |
| SAPR-8   | 5  | D4d | Square antiprism                           |
| TDD-8    | 6  | D2d | Triangular dodecahedron                    |
| JGBF-8   | 7  | D2d | Johnson gyrobifastigium J26                |
| JETBPY-8 | 8  | D3h | Johnson elongated triangular bipyramid J14 |
| JBTPR-8  | 9  | C2v | Biaugmented trigonal prism J50             |
| BTPR-8   | 10 | C2v | Biaugmented trigonal prism                 |
| JSD-8    | 11 | D2d | Snub diphenoid J84                         |
| TT-8     | 12 | Td  | Triakis tetrahedron                        |
| ETBPY-8  | 13 | D3h | Elongated trigonal bipyramid               |

| Structure [ML8 ] | OP-8      | HPY-8   | HBPY-8  | CU-8   | SAPR-8 | TDD-8  | JGBF-8  | JETBPY-8 | JBTPR-8 | BTPR-8 | JSD-8  | TT-8   | ETBPY-8 |
|------------------|-----------|---------|---------|--------|--------|--------|---------|----------|---------|--------|--------|--------|---------|
| ABOXIY           | , 31.222, | 22.757, | 14.954, | 7.538, | 1.056, | 1.250, | 16.006, | 28.569,  | 2.838,  | 2.114, | 4.618, | 8.275, | 23.387  |

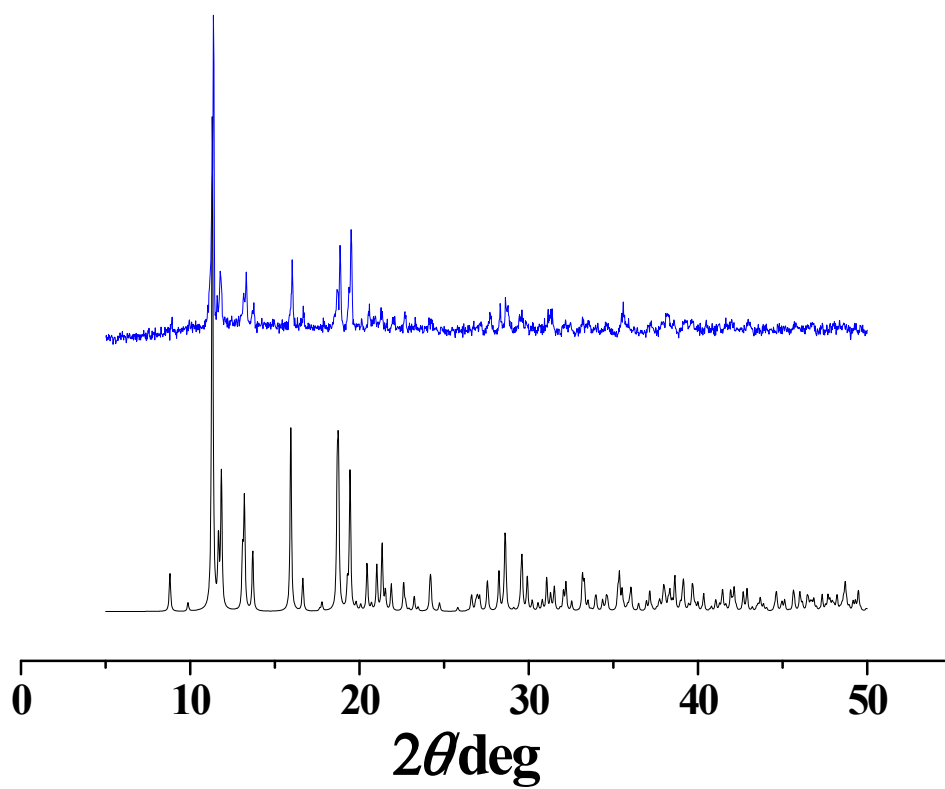

**Fig. S1.** The simulative (black) and experimental (blue) powder X-ray diffraction patterns for **1**.

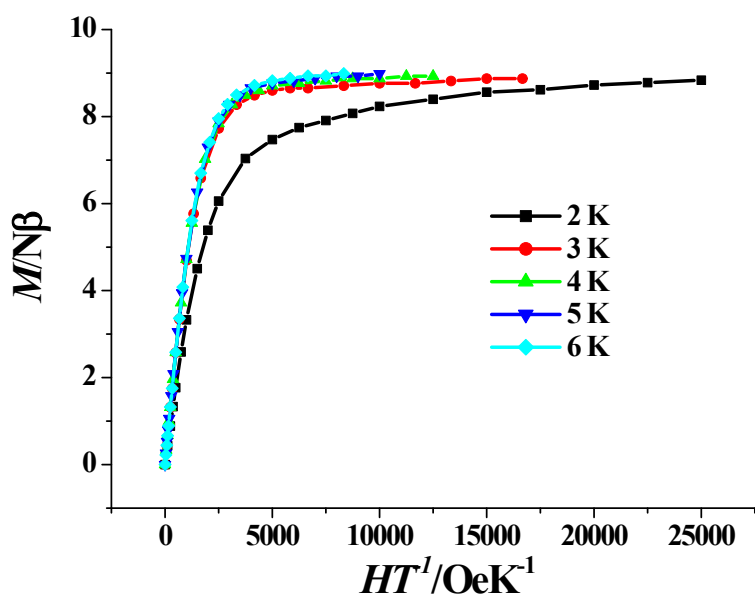

Fig. S2.  $M$  versus  $H/T$  plots at 2–6 K of **1**.

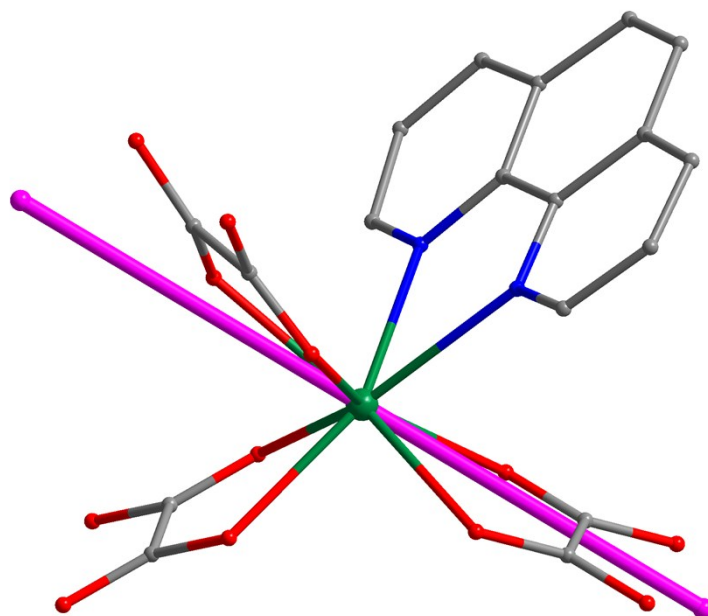

Fig. S3. Magnetic axis of the  $\text{Dy}^{3+}$  ion in **1** calculated by an electrostatic method

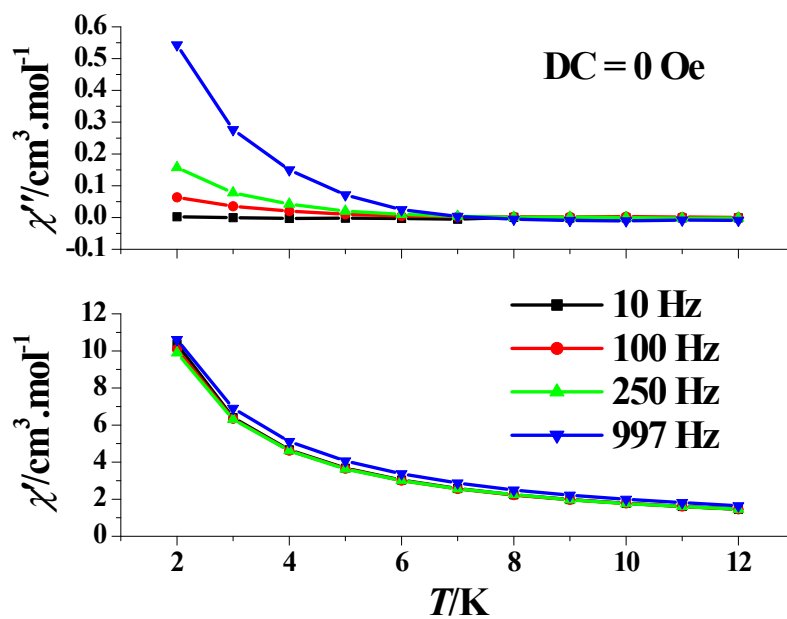

Fig. S4. AC susceptibilities measured in a 2.5 Oe ac magnetic field with a zero dc field for **1**.

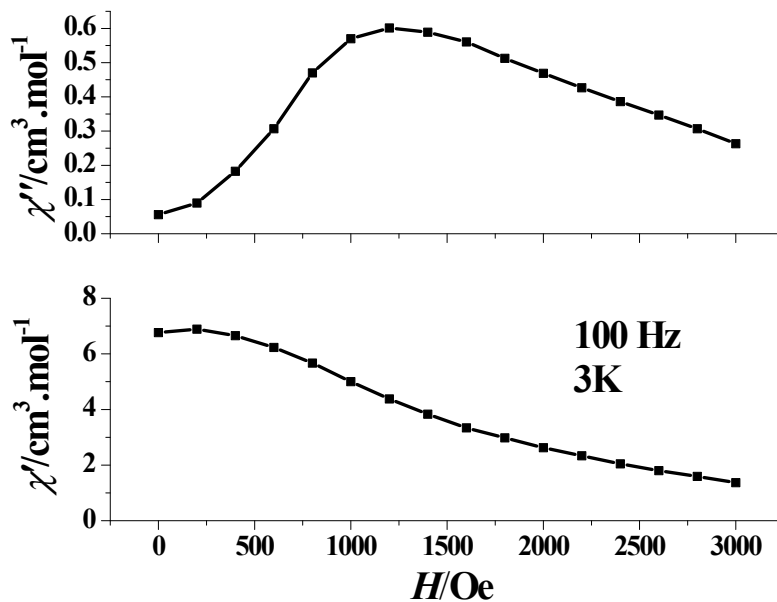

Fig. S5. AC susceptibilities measured in a 2.5 Oe ac magnetic field with variable dc fields at 100 Hz and 3 K for **1**.

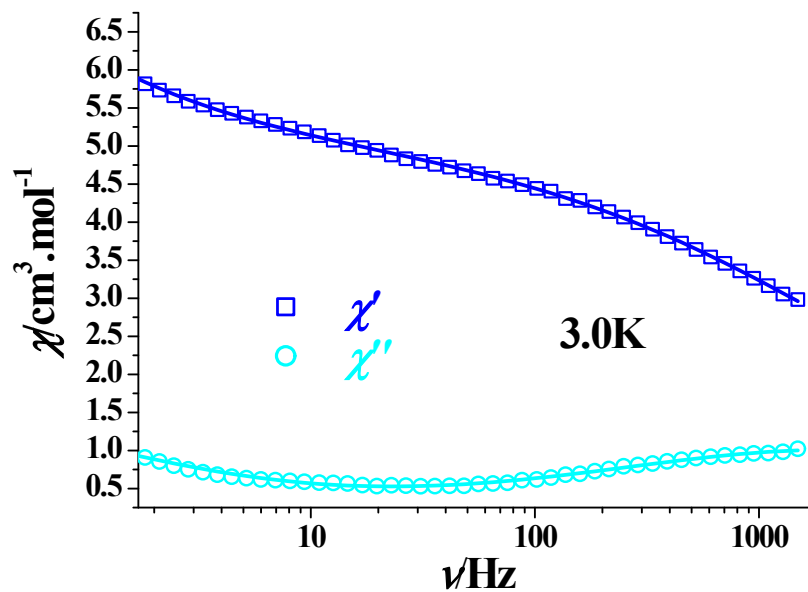

**Fig. S6** Frequency dependence of the in-phase ( $\chi'$ , top) and out-of-phase ( $\chi''$ , bottom) ac susceptibility of **1** at 3.0 K. the solid lines represent the best fitting with the sum of two modified Debye functions.

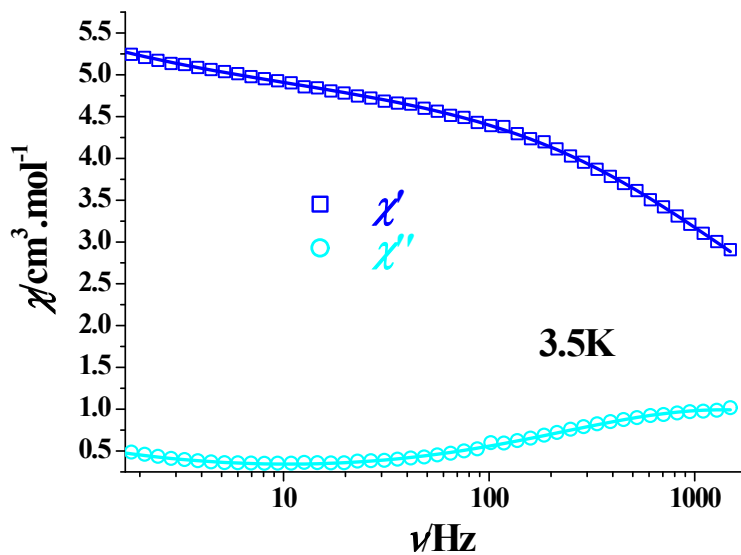

**Fig. S7** Frequency dependence of the in-phase ( $\chi'$ , top) and out-of-phase ( $\chi''$ , bottom) ac susceptibility of **1** at 3.5 K. the solid lines represent the best fitting with the sum of two modified Debye functions.

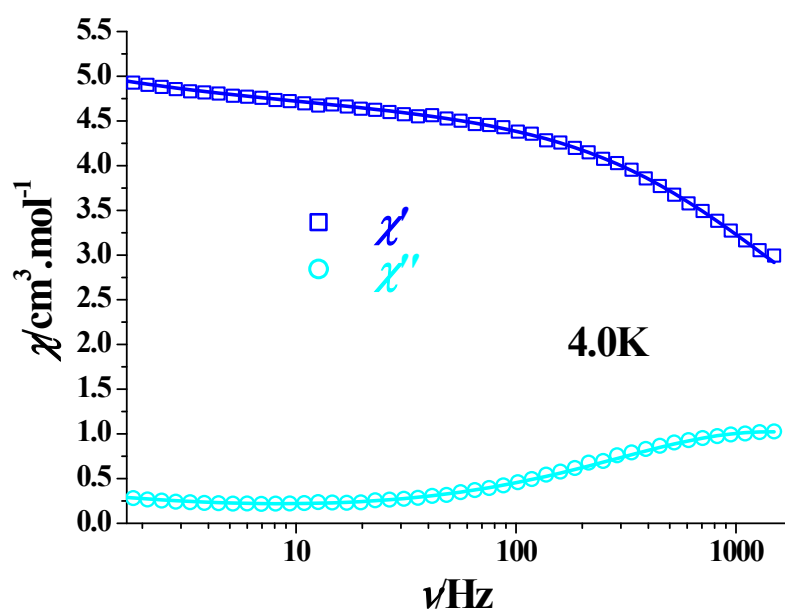

**Fig. S8.** Frequency dependence of the in-phase ( $\chi'$ , top) and out-of-phase ( $\chi''$ , bottom) ac susceptibility of **1** at 4.0 K. the solid lines represent the best fitting with the sum of two modified Debye functions.

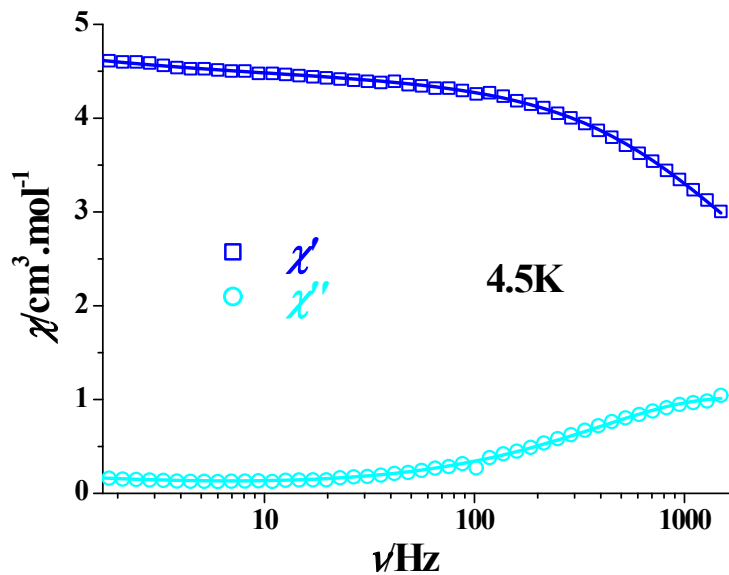

**Fig. S9.** Frequency dependence of the in-phase ( $\chi'$ , top) and out-of-phase ( $\chi''$ , bottom) ac susceptibility of **1** at 4.5 K. the solid lines represent the best fitting with the sum of two modified Debye functions.

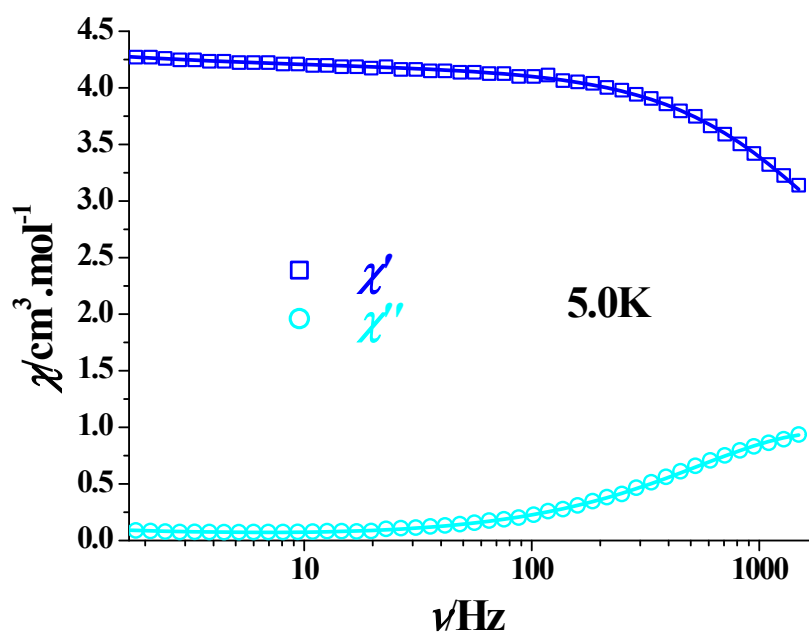

**Fig. S10.** Frequency dependence of the in-phase ( $\chi'$ , top) and out-of-phase ( $\chi''$ , bottom) ac susceptibility of **1** at 5.0 K. the solid lines represent the best fitting with the sum of two modified Debye functions.

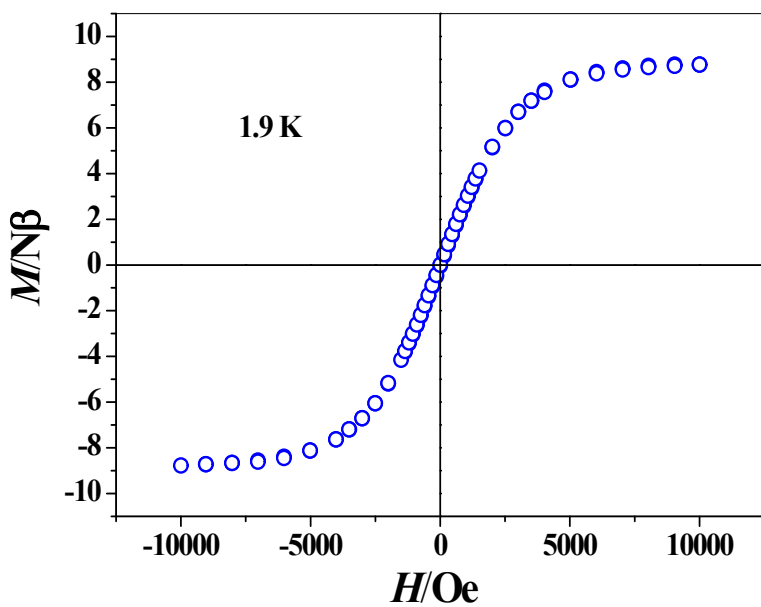

**Fig. S11.** Plot of  $M$  versus  $H$  at 1.9 K from  $-10000$  to  $10000$  Oe for **1**.



**Table S2.** Some examples of high-dimensional DyMOFs behaving as SMMs.

| Structural formula                                                                                                                                   | Dimension | Coordination configuration                           | Magnetic interaction          | DC field (Oe) | $U_{\text{eff}}$ (K) | Ref.      |
|------------------------------------------------------------------------------------------------------------------------------------------------------|-----------|------------------------------------------------------|-------------------------------|---------------|----------------------|-----------|
| [Dy(3-py-4-pmc)(C <sub>2</sub> O <sub>4</sub> ) <sub>0.5</sub> (OH)(H <sub>2</sub> O)]                                                               | 2D        | square antiprism                                     | ferromagnetic                 | 0             | 186                  | 5d        |
| [Dy <sub>2</sub> (HCAM) <sub>3</sub> (H <sub>2</sub> O) <sub>4</sub> ] <sub>2</sub> ·H <sub>2</sub> O                                                | 2D        | spherical tricapped trigonal prism; square antiprism | ferromagnetic                 | 2000          | 63.5, 57.1           | 5q        |
| [Ln <sub>2</sub> (glu) <sub>2</sub> (μ <sub>3</sub> -OH) <sub>2</sub> (H <sub>2</sub> O)]·H <sub>2</sub> O                                           | 2D        | triangular dodecahedron                              | ferromagnetic                 | 0             | 112                  | 5k        |
| {[Ln(NNO)(glu)]·0.25H <sub>2</sub> O}                                                                                                                | 2D        | spherical capped square antiprism                    | anti-ferromagnetic (possible) | 2000          | 44.2                 | 5p        |
| (EMIM)[Dy <sub>3</sub> (BDC) <sub>5</sub> ]                                                                                                          | 3D        | triangular dodecahedron                              | anti-ferromagnetic (possible) | 2000          | 39.3                 | 5l        |
| [Dy <sub>2</sub> (1H-5-Cl-6-Opy-3-CO <sub>2</sub> ) <sub>2</sub> (C <sub>2</sub> O <sub>4</sub> ) <sub>2</sub> (H <sub>2</sub> O)]·2H <sub>2</sub> O | 3D        | monocapped square antiprism; pentagonal bipyramid    | anti-ferromagnetic (possible) | 2000          | 37.6                 | 5o        |
| Dy <sub>2</sub> (dcps) <sub>3</sub> (H <sub>2</sub> O) <sub>5</sub>                                                                                  | 2D        | square antiprism; bicapped trigonal prism            | anti-ferromagnetic (possible) | 2000          | 12.5                 | 5n        |
| Dy <sub>2</sub> (INO) <sub>4</sub> (NO <sub>3</sub> ) <sub>2</sub> ·2MeCN                                                                            | 3D        | square antiprism                                     | anti-ferromagnetic (possible) | 0             | 110                  | 5a        |
| (H <sub>3</sub> O)[Ln(NA) <sub>2</sub> ]·H <sub>2</sub> O                                                                                            | 2D        | octahedron                                           | anti-ferromagnetic (possible) | 1000          | 75                   | 5b        |
| [Ln(bipyNO) <sub>4</sub> ](TfO) <sub>3</sub> ·x solvent                                                                                              | 3D        | square antiprism                                     | anti-ferromagnetic (possible) | 1000          | 17.9                 | 5c        |
| [Dy(hip)phen]                                                                                                                                        | 3D        | pentagonal bipyramid                                 | ferromagnetic                 | 0             | 131                  | 5g        |
| [Ln(hfac) <sub>3</sub> ] <sub>2</sub> (4,4'-BipyNO) <sub>2</sub>                                                                                     | 3D        | capped square antiprism                              | anti-ferromagnetic (possible) | 1900          | 10.3                 | 5h        |
| Dy(BTC)                                                                                                                                              | 3D        | trigonal prism                                       | anti-ferromagnetic (possible) | 1000          | 45.9                 | 5s        |
| [Dy(C <sub>2</sub> O <sub>4</sub> ) <sub>1.5</sub> (H <sub>2</sub> O) <sub>3</sub> ]·2H <sub>2</sub> O                                               | 2D        | tricapped trigonal prism                             | anti-ferromagnetic (possible) | 700           | 3.8, 10.7            | 9         |
| Dy(C <sub>2</sub> O <sub>4</sub> ) <sub>1.5</sub> phen]·0.5H <sub>2</sub> O                                                                          | 3D        | square antiprism                                     | ferromagnetic                 | 1200          | 35.5, 32.6           | this work |

**Abbreviations:** 3-py-4-pmc = 2-(3-pyridyl)pyrimidine-4-carboxylate; CAM = 4-hydroxypyridine-2,6-dicarboxylate; H<sub>2</sub>glu = 2,2-dimethylglutaric acid; HNNO = nicotinic acid N-oxide, H<sub>2</sub>glu = glutaric acid; H<sub>2</sub>BDC = 1,4-benzenedicarboxylic acid, EMIM = 1-ethyl-3-methylimidazolium; 1H-5-Cl-6-Opy-3-CO<sub>2</sub> = 1-hydro-5-chloro-6-oxopyridine-3-carboxylate; H<sub>2</sub>dcps = 4,4'-dicarboxybiphenyl sulfone; HINO = isonicotinic acid N-oxide; H<sub>2</sub>NA = 5-hydroxynicotinic acid; bipyNO = 4,4'-bipyridine-N,N'-dioxide, TfO = triflate; H<sub>3</sub>hip = 5-hydroxyisophthalic acid, phen = 1,10-phenanthroline; 4,4'-BipyNO = 4,4'-bipyridine N,N'-dioxide; BTC = 1,3,5-benzenetricarboxylate.

**Table S3.** Linear combination of two modified Debye model fitting parameters at 3-5 K of **1** under 1.2 kOe dc field.

| $T(\text{K})$ | $\chi_2(\text{cm}^3.\text{mol}^{-1})$ | $\chi_1(\text{cm}^3.\text{mol}^{-1})$ | $\chi_0(\text{cm}^3.\text{mol}^{-1})$ | $\tau_1(\text{s})$ | $\alpha_1$ | $\tau_2(\text{s})$ | $\alpha_2$ |
|---------------|---------------------------------------|---------------------------------------|---------------------------------------|--------------------|------------|--------------------|------------|
| 3.0           | 11.51064                              | 4.88819                               | 0.68109                               | 0.00009            | 0.4534     | 1.34619            | 0.46814    |
| 3.5           | 14.56681                              | 4.80332                               | 0.97193                               | 0.00011            | 0.40169    | 26.0164            | 0.53083    |
| 4.0           | 8.33111                               | 4.63746                               | 1.23079                               | 0.00010            | 0.31772    | 7.50116            | 0.52176    |
| 4.5           | 5.78684                               | 4.43113                               | 1.33996                               | 0.00009            | 0.26464    | 2.30764            | 0.50525    |
| 5.0           | 4.88441                               | 4.18072                               | 1.55955                               | 0.00008            | 0.20261    | 1.80177            | 0.46836    |
